# Supplementary material for: Experimental evidence of chemical attraction in the mutualistic zebra mussel-killer shrimp system
Source: PeerJ. 2019 Nov 21;7:e8075. doi: 10.7717/peerj.8075 (PMC6875389; doi:10.7717/peerj.8075)
Supplement: Supplemental Information 1 — Zebra mussel density choice in killer shrimp [file peerj-07-8075-s001.xlsx]

## Sheet: Exp 1. Density choice
Killer_Shrimp_ID	Population	Type	Date	Water_temperature	Time_day	Treatment	Percentage_choice	Choice	Behaviour
1	Cardiff	Sympatric	2016-03-14	15.6	15:10:00	A	33	high	hide
2	Cardiff	Sympatric	2016-03-14	15.6	15:10:00	A	33	high	hide
3	Cardiff	Sympatric	2016-03-14	15.6	15:10:00	A	33	high	hide
4	Cardiff	Sympatric	2016-03-14	15.6	15:10:00	A	33	high	hide
5	Cardiff	Sympatric	2016-03-14	15.6	15:48:00	D	33	low	hide
6	Cardiff	Sympatric	2016-03-14	15.6	15:48:00	D	66	high	hide
7	Cardiff	Sympatric	2016-03-14	15.6	15:48:00	D	66	high	hide
8	Cardiff	Sympatric	2016-03-14	15.6	15:48:00	D	66	high	hide
9	Cardiff	Sympatric	2016-03-14	15.6	16:23:00	E	33	low	hide
10	Cardiff	Sympatric	2016-03-14	15.6	16:23:00	E	33	low	hide
11	Cardiff	Sympatric	2016-03-14	15.6	16:23:00	E	100	high	hide
12	Cardiff	Sympatric	2016-03-14	15.6	16:23:00	E	33	low	hide
13	Cardiff	Sympatric	2016-03-14	15.6	17:00:00	B	66	high	hide
14	Cardiff	Sympatric	2016-03-14	15.6	17:00:00	B	66	high	hide
15	Cardiff	Sympatric	2016-03-14	15.6	17:00:00	B	66	high	swim
16	Cardiff	Sympatric	2016-03-14	15.6	17:00:00	B	66	high	hide
17	Cardiff	Sympatric	2016-03-15	15.5	17:33:00	D	33	low	swim
18	Cardiff	Sympatric	2016-03-15	15.5	17:33:00	D	66	high	hide
19	Cardiff	Sympatric	2016-03-15	15.5	17:33:00	D	66	high	hide
20	Cardiff	Sympatric	2016-03-15	15.5	17:33:00	D	66	high	hide
21	Cardiff	Sympatric	2016-03-15	15.5	18:09:00	F	100	high	hide
22	Cardiff	Sympatric	2016-03-15	15.5	18:09:00	F	66	low	hide
23	Cardiff	Sympatric	2016-03-15	15.5	18:09:00	F	100	high	hide
24	Cardiff	Sympatric	2016-03-15	15.5	18:09:00	F	66	low	hide
25	Cardiff	Sympatric	2016-03-15	15.5	15:40:00	C	100	high	hide
26	Cardiff	Sympatric	2016-03-15	15.5	15:40:00	C	100	high	hide
27	Cardiff	Sympatric	2016-03-15	15.5	15:40:00	C	100	high	hide
28	Cardiff	Sympatric	2016-03-15	15.5	15:40:00	C	0	low	swim
29	Cardiff	Sympatric	2016-03-15	15.5	16:18:00	E	100	high	hide
30	Cardiff	Sympatric	2016-03-15	15.5	16:18:00	E	100	high	hide
31	Cardiff	Sympatric	2016-03-15	15.5	16:18:00	E	33	low	hide
32	Cardiff	Sympatric	2016-03-15	15.5	16:18:00	E	33	low	hide
33	Cardiff	Sympatric	2016-03-18	15.8	16:52:00	F	66	low	hide
34	Cardiff	Sympatric	2016-03-18	15.8	16:52:00	F	66	low	hide
35	Cardiff	Sympatric	2016-03-18	15.8	16:52:00	F	66	low	hide
36	Cardiff	Sympatric	2016-03-18	15.8	16:52:00	F	100	high	hide
37	Cardiff	Sympatric	2016-03-18	15.8	17:27:00	A	0	low	swim
38	Cardiff	Sympatric	2016-03-18	15.8	17:27:00	A	33	high	hide
39	Cardiff	Sympatric	2016-03-18	15.8	17:27:00	A	33	high	hide
40	Cardiff	Sympatric	2016-03-18	15.8	17:27:00	A	33	high	hide
41	Cardiff	Sympatric	2016-03-18	15.8	17:59:00	B	66	high	hide
42	Cardiff	Sympatric	2016-03-18	15.8	17:59:00	B	0	low	swim
43	Cardiff	Sympatric	2016-03-18	15.8	17:59:00	B	66	high	hide
44	Cardiff	Sympatric	2016-03-18	15.8	17:59:00	B	66	high	hide
45	Cardiff	Sympatric	2016-03-18	15.8	18:32:00	C	100	high	hide
46	Cardiff	Sympatric	2016-03-18	15.8	18:32:00	C	100	high	hide
47	Cardiff	Sympatric	2016-03-18	15.8	18:32:00	C	100	high	hide
48	Cardiff	Sympatric	2016-03-18	15.8	18:32:00	C	100	high	swim
49	Cardiff	Sympatric	2016-03-19	15.7	09:16:00	A	33	high	hide
50	Cardiff	Sympatric	2016-03-19	15.7	09:16:00	A	33	high	hide
51	Cardiff	Sympatric	2016-03-19	15.7	09:16:00	A	33	high	hide
52	Cardiff	Sympatric	2016-03-19	15.7	09:16:00	A	33	high	hide
53	Cardiff	Sympatric	2016-03-19	15.7	09:46:00	A	33	high	hide
54	Cardiff	Sympatric	2016-03-19	15.7	09:46:00	A	0	low	swim
55	Cardiff	Sympatric	2016-03-19	15.7	09:46:00	A	33	high	hide
56	Cardiff	Sympatric	2016-03-19	15.7	09:46:00	A	33	high	hide
57	Cardiff	Sympatric	2016-03-19	15.7	10:19:00	B	66	high	hide
58	Cardiff	Sympatric	2016-03-19	15.7	10:19:00	B	66	high	hide
59	Cardiff	Sympatric	2016-03-19	15.7	10:19:00	B	66	high	hide
60	Cardiff	Sympatric	2016-03-19	15.7	10:19:00	B	66	high	hide
61	Cardiff	Sympatric	2016-03-19	15.7	10:50:00	B	66	high	hide
62	Cardiff	Sympatric	2016-03-19	15.7	10:50:00	B	66	high	hide
63	Cardiff	Sympatric	2016-03-19	15.7	10:50:00	B	66	high	swim
64	Cardiff	Sympatric	2016-03-19	15.7	10:50:00	B	66	high	hide
65	Cardiff	Sympatric	2016-03-20	15.6	11:21:00	C	100	high	hide
66	Cardiff	Sympatric	2016-03-20	15.6	11:21:00	C	100	high	hide
67	Cardiff	Sympatric	2016-03-20	15.6	11:21:00	C	100	high	hide
68	Cardiff	Sympatric	2016-03-20	15.6	11:21:00	C	100	high	hide
69	Cardiff	Sympatric	2016-03-20	15.6	11:53:00	C	100	high	hide
70	Cardiff	Sympatric	2016-03-20	15.6	11:53:00	C	100	high	hide
71	Cardiff	Sympatric	2016-03-20	15.6	11:53:00	C	100	high	hide
72	Cardiff	Sympatric	2016-03-20	15.6	11:53:00	C	100	high	hide
73	Cardiff	Sympatric	2016-03-20	15.6	13:02:00	D	66	high	hide
74	Cardiff	Sympatric	2016-03-20	15.6	13:02:00	D	33	low	hide
75	Cardiff	Sympatric	2016-03-20	15.6	13:02:00	D	66	high	hide
76	Cardiff	Sympatric	2016-03-20	15.6	13:02:00	D	66	high	hide
77	Cardiff	Sympatric	2016-03-20	15.6	13:37:00	D	66	high	hide
78	Cardiff	Sympatric	2016-03-20	15.6	13:37:00	D	33	low	hide
79	Cardiff	Sympatric	2016-03-20	15.6	13:37:00	D	33	low	hide
80	Cardiff	Sympatric	2016-03-20	15.6	13:37:00	D	33	low	hide
81	Cardiff	Sympatric	2016-03-21	15.6	14:11:00	E	33	low	hide
82	Cardiff	Sympatric	2016-03-21	15.6	14:11:00	E	33	low	hide
83	Cardiff	Sympatric	2016-03-21	15.6	14:11:00	E	33	low	swim
84	Cardiff	Sympatric	2016-03-21	15.6	14:11:00	E	33	low	hide
85	Cardiff	Sympatric	2016-03-21	15.6	14:42:00	E	100	high	hide
86	Cardiff	Sympatric	2016-03-21	15.6	14:42:00	E	33	low	hide
87	Cardiff	Sympatric	2016-03-21	15.6	14:42:00	E	33	low	swim
88	Cardiff	Sympatric	2016-03-21	15.6	14:42:00	E	33	low	hide
89	Cardiff	Sympatric	2016-03-21	15.6	15:13:00	F	66	low	hide
90	Cardiff	Sympatric	2016-03-21	15.6	15:13:00	F	100	high	hide
91	Cardiff	Sympatric	2016-03-21	15.6	15:13:00	F	66	low	hide
92	Cardiff	Sympatric	2016-03-21	15.6	15:13:00	F	100	high	hide
93	Cardiff	Sympatric	2016-03-21	15.6	15:44:00	F	100	high	hide
94	Cardiff	Sympatric	2016-03-21	15.6	15:44:00	F	100	high	hide
95	Cardiff	Sympatric	2016-03-21	15.6	15:44:00	F	100	high	hide
96	Cardiff	Sympatric	2016-03-21	15.6	15:44:00	F	66	low	swim
